# Supplementary material
Source: publisher figshare collection journal article supplement (https://asha.figshare.com/ndownloader/files/31526732)
Supplement: Supplementary file 1 [file 31526732]

### **Key for Supplemental Material S3.**

Laryngeal imaging key:

*Glottal margins (smoothness, straightness):* smooth; right vocal fold edge is atrophic and bowed.

*Supraglottal compression:* was lateral-medial, left greater than right and mild anterior-posterior.

*Mucosal wave:* asymmetric.

*Amplitude of vibration:* reduced.

*Adynamic segments:* none.

*Glottal closure pattern:* incomplete and open phased dominant with compensation & effort.

*Left/right phase symmetry:* asymmetric & open-phase dominant.
